# Supplementary material
Source: PubMed Central journal article supplement (PMC5083094)
Supplement: supp_M115.055798_Supplemental_Figure_3.pdf [file supp_M115.055798_Supplemental_Figure_3.pdf]

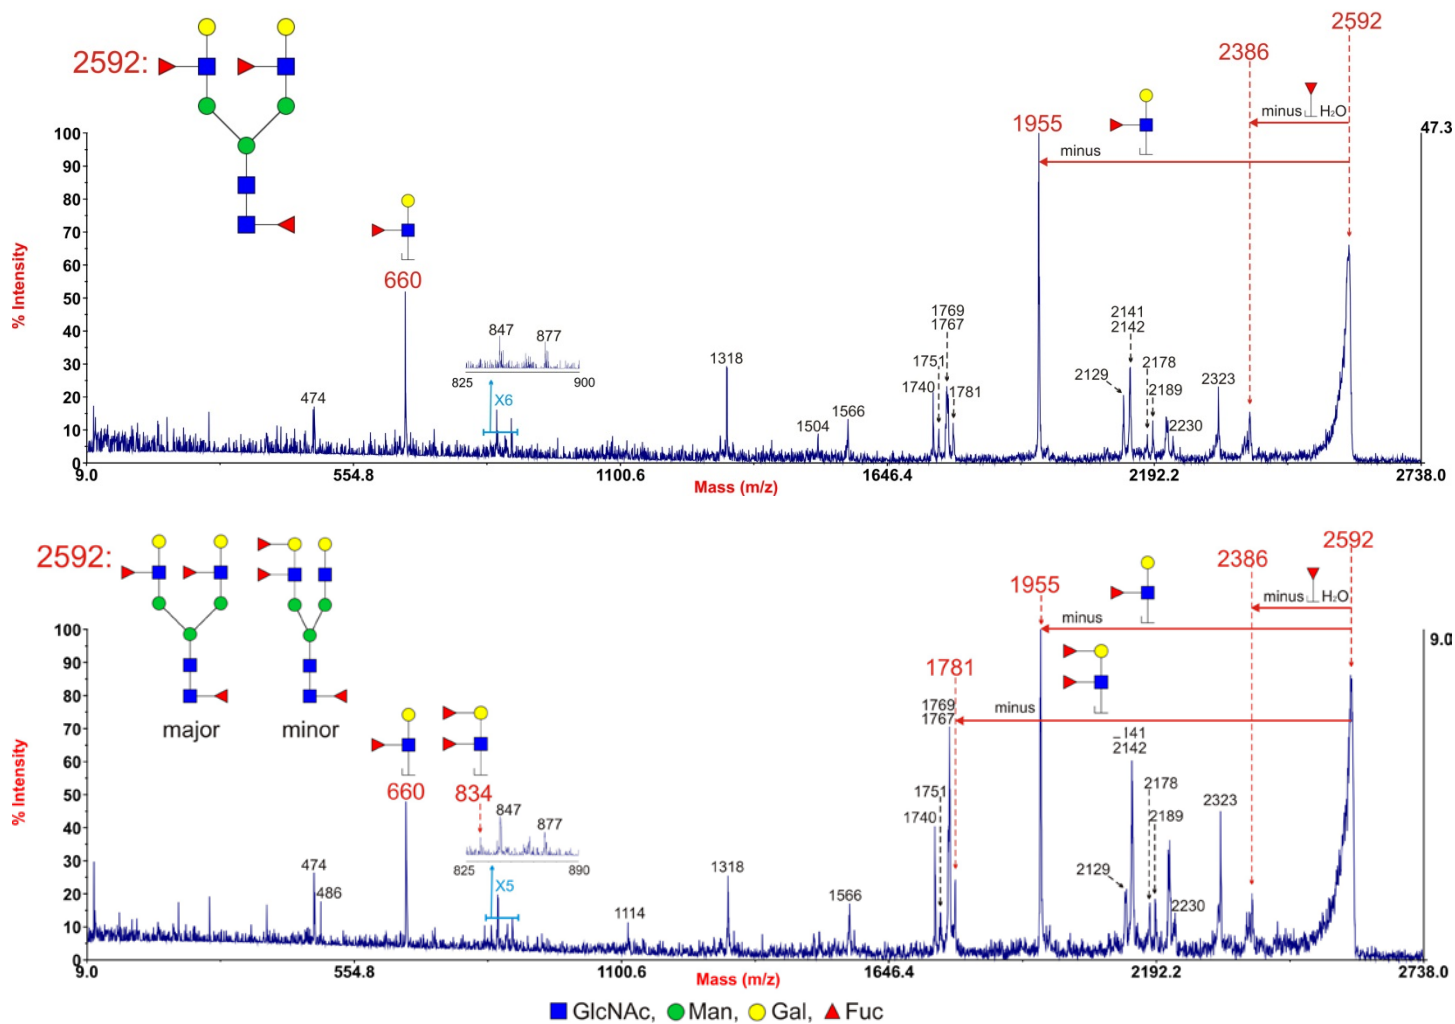

**Fig. S3. Annotated MALDI-TOF/TOF MS/MS spectra of permethylated N-glycan at m/z 2592 in the CTB (upper panel) and STB (lower panel).** Data were acquired in the form of [M+Na]<sup>+</sup> ions. Peaks were annotated with putative fragment ions according to the molecular weight.
