# Supplementary material
Source: PubMed Central journal article supplement (PMC5083094)
Supplement: supp_M115.055798_Supplemental_Figure_4.pdf [file supp_M115.055798_Supplemental_Figure_4.pdf]

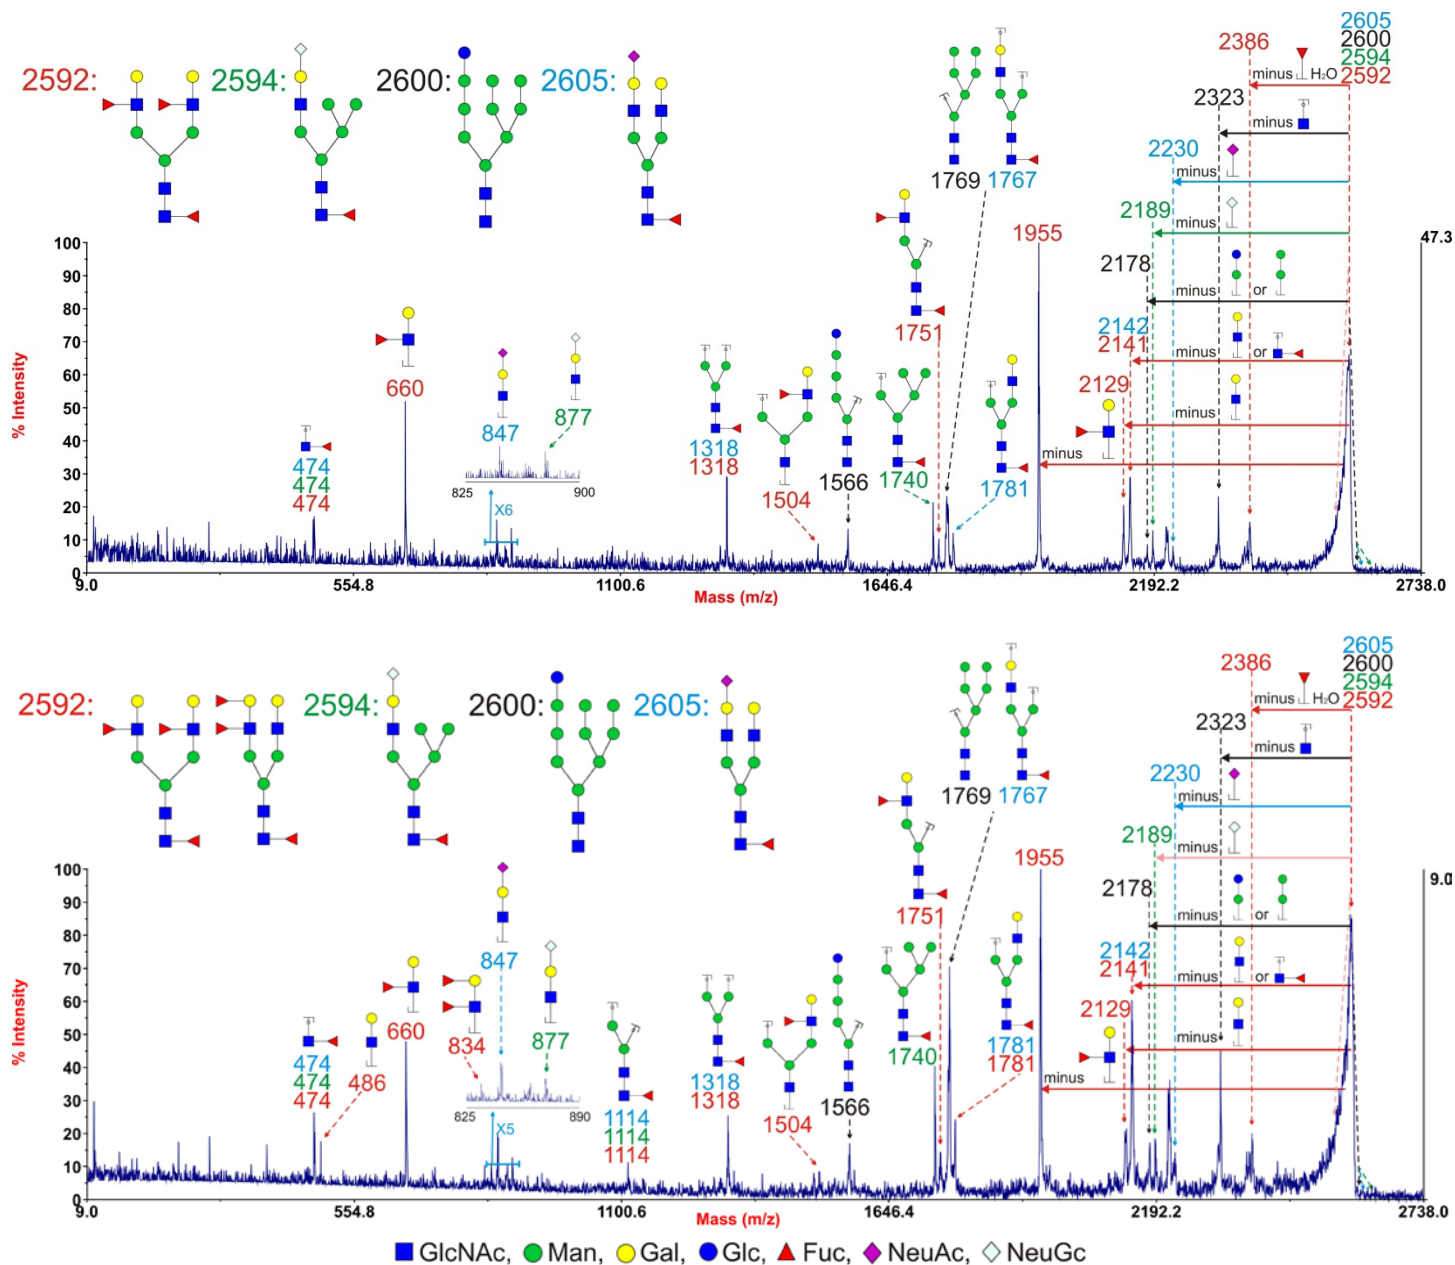

**Fig. S4. Fully annotated MALDI-TOF/TOF MS/MS spectra of permethylated N-glycan at  $m/z$  2592 in the CTB (upper panel) and STB (lower panel).** Data were acquired in the form of  $[M+Na]^+$  ions. Peaks were annotated with putative fragment ions according to the molecular weight. The glycan  $m/z$  values and their corresponding fragment ions are labelled in the same color (red, green, black or blue).
