# Supplementary material
Source: PubMed Central journal article supplement (PMC5083094)
Supplement: supp_M115.055798_Supplemental_Figure_5.pdf [file supp_M115.055798_Supplemental_Figure_5.pdf]

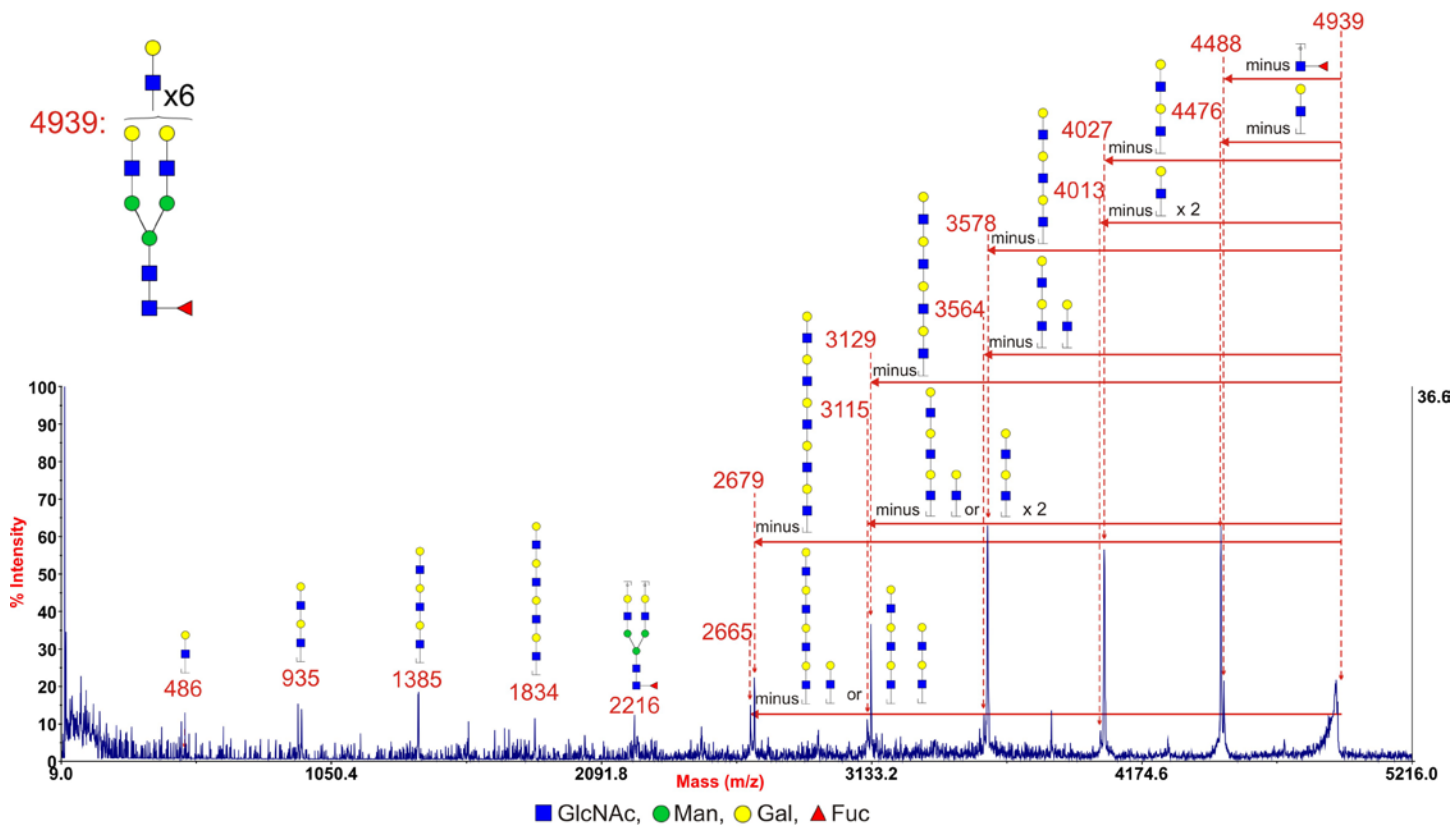

**Fig. S5. Annotated MALDI-TOF MS spectrum of permethylated sialidase S digested N-glycan at 4939 from CTB.** Data were acquired in the form of  $[M+Na]^+$  ions. Peaks were annotated with putative fragment ions according to the molecular weight.
