# Supplementary material
Source: PubMed Central journal article supplement (PMC5083094)
Supplement: supp_M115.055798_Supplemental_Table_2.pdf [file supp_M115.055798_Supplemental_Table_2.pdf]

## Supplementary Table 2

### Annotations of m/z values in Figs 1, 2 and 3 which are not labeled with cartoons in those figures

These structures are based on the molecular weight, N-glycan biosynthetic pathway, MS/MS data and enzymatic digestion results. These structures are simplified to biantennary structures, with additional LacNAc units and capping sugars listed outside the bracket. The NeuGc containing glycan at m/z 2635 is likely diet-derived (83, 84). m/z is mass to charge ratio. ■ GlcNAc, ● Man, ● Gal, ● Glc, ▲ Fuc, ◆ NeuAc, ◇ NeuGc.

| Observed m/z value           | glycan structure | Observed m/z value | glycan structure | Observed m/z value | glycan structure | Observed m/z value | glycan structure | Observed m/z value | glycan structure |
|------------------------------|------------------|--------------------|------------------|--------------------|------------------|--------------------|------------------|--------------------|------------------|
| 2029.1                       |                  | 2285.1             |                  | 2605.1,<br>2605.2  |                  | 2779.2,<br>2779.3  |                  | 3054.2,<br>3054.3  |                  |
| 2070.1                       |                  | 2315.1,<br>2315.2  |                  | 2635.2             |                  | 2792.2,<br>2792.3  |                  | 3140.2,<br>3140.3  |                  |
| 2081.0,<br>2081.1,<br>2081.2 |                  | 2519.2             |                  | 2663.2             |                  | 2837.2,<br>2837.3  |                  | 3142.3             |                  |
| 2156.0,<br>2156.1            |                  | 2592.1,<br>2592.2  |                  | 2676.2             |                  | 2880.2,<br>2880.3  |                  | 3241.3             |                  |
| 2244.1                       |                  | 2600.2             |                  | 2693.2,<br>2693.3  |                  | 3024.2,<br>3024.3  |                  |                    |                  |
