# Supplementary material
Source: PubMed Central journal article supplement (PMC5083094)
Supplement: supp_M115.055798_Supplemental_Table_3.pdf [file supp_M115.055798_Supplemental_Table_3.pdf]

### Supplementary Table 3

#### Summary of GC-MS linkage analysis of partially methylated alditol acetates derived from N-glycans of CTB and STB

The elution time is indicated in minutes and the relative abundance is normalised to 1 which is the abundance of 2-linked mannose (major component).

| Elution time, min (CTB) | Elution time, min (STB) | Characteristic fragment ions | Assignments       | Relative abundance (CTB) | Relative abundance (STB) |
|-------------------------|-------------------------|------------------------------|-------------------|--------------------------|--------------------------|
| 16.95                   | 16.90                   | 102, 115, 118, 131, 162, 175 | Terminal Fuc      | 0.16                     | 0.14                     |
| 18.45                   | 18.40                   | 102, 118, 129, 145, 161, 205 | Terminal Man      | 0.68                     | 0.62                     |
| 18.71                   | 18.67                   | 102, 118, 129, 145, 161, 205 | Terminal Gal      | 0.15                     | 0.17                     |
| 19.62                   | 19.56                   | 129, 130, 161, 190, 234      | 2-linked Man      | 1                        | 1                        |
| 19.90                   | 19.85                   | 118, 129, 161, 203, 234      | 3-linked Gal      | 0.07                     | 0.10                     |
| 21.18                   | 21.14                   | 87, 88, 129, 130, 189, 190   | 2,6-linked Man    | 0.05                     | 0.05                     |
| 21.34                   | 21.30                   | 118, 129, 189, 202, 234      | 3,6-linked Man    | 0.33                     | 0.34                     |
| 21.80                   | 21.76                   | 118, 139, 259, 333           | 3,4,6-linked Man  | 0.08                     | 0.07                     |
| 22.27                   | 22.23                   | 117, 129, 145, 205, 247      | Terminal GlcNAc   | 0.04                     | 0.04                     |
| 23.15                   | 23.12                   | 117, 159, 233                | 4-linked GlcNAc   | 0.22                     | 0.39                     |
| 24.00                   | 23.96                   | 117, 159, 346                | 3,4-linked GlcNAc | 0.03                     | 0.03                     |
| 24.46                   | 24.42                   | 117, 159, 261                | 4,6-linked GlcNAc | 0.04                     | 0.08                     |
