# Supplementary material
Source: PubMed Central journal article supplement (PMC5083094)
Supplement: supp_M115.055798_Supplemental_Table_4.pdf [file supp_M115.055798_Supplemental_Table_4.pdf]

**Supplementary Table 4****Permethylated N-glycans observed in the MALDI-TOF MS spectrum of STB**

The theoretical and observed m/z values of the glycans and the manual interpretations of the composition of these glycans are shown in the table. m/z is mass to charge ratio. Hex, hexose; HexNAc, N-acetylhexosamine; Fuc, Fucose; NeuAc, N-acetylneuraminic acid; NeuGc, N-glycolylneuraminic acid. The number behind the monosaccharide is its number in the corresponding glycan.

| Theoretical m/z value | Observed m/z value | Glycan composition    | Theoretical m/z value | Observed m/z value | Glycan composition    |
|-----------------------|--------------------|-----------------------|-----------------------|--------------------|-----------------------|
| 1579.8                | 1579.8             | Hex5HexNAc2           | 2792.4                | 2792.2             | Hex5HexNAc4NeuAc2     |
| 1783.9                | 1783.9             | Hex6HexNAc2           | 2837.4                | 2837.2             | Hex5HexNAc5Fuc3       |
| 1835.9                | 1835.9             | Hex3HexNAc4Fuc1       | 2850.4                | 2850.2             | Hex5HexNAc5Fuc1NeuAc1 |
| 1988.0                | 1988.0             | Hex7HexNAc2           | 2880.4                | 2880.2             | Hex6HexNAc5NeuAc1     |
| 2040.0                | 2040.0             | Hex4HexNAc4Fuc1       | 2966.5                | 2966.2             | Hex5HexNAc4Fuc1NeuAc2 |
| 2081.1                | 2081.0             | Hex3HexNAc5Fuc1       | 3024.5                | 3024.2             | Hex5HexNAc5Fuc2NeuAc1 |
| 2156.1                | 2156.0             | Hex4HexNAc3Fuc1NeuAc1 | 3054.5                | 3054.2             | Hex6HexNAc5Fuc1NeuAc1 |
| 2192.1                | 2192.0             | Hex8HexNAc2           | 3140.6                | 3140.3             | Hex5HexNAc4Fuc2NeuAc2 |
| 2244.1                | 2244.1             | Hex5HexNAc4Fuc1       | 3142.6                | 3142.3             | Hex7HexNAc6Fuc1       |
| 2285.2                | 2285.1             | Hex4HexNAc5Fuc1       | 3211.6                | 3211.3             | Hex5HexNAc5Fuc1NeuAc2 |
| 2315.2                | 2315.1             | Hex5HexNAc5           | 3299.7                | 3299.3             | Hex6HexNAc6Fuc1NeuAc1 |
| 2396.2                | 2396.1             | Hex9HexNAc2           | 3415.7                | 3415.3             | Hex6HexNAc5Fuc1NeuAc2 |
| 2431.2                | 2431.1             | Hex5HexNAc4NeuAc1     | 3589.8                | 3589.4             | Hex6HexNAc5Fuc2NeuAc2 |
| 2489.3                | 2489.1             | Hex5HexNAc5Fuc1       | 3602.8                | 3602.3             | Hex6HexNAc5NeuAc3     |
| 2592.3                | 2592.1             | Hex5HexNAc4Fuc3       | 3776.9                | 3776.4             | Hex6HexNAc5Fuc1NeuAc3 |
| 2600.3                | 2600.2             | Hex10HexNAc2          | 3864.9                | 3864.4             | Hex7HexNAc6Fuc1NeuAc2 |
| 2605.3                | 2605.1             | Hex5HexNAc4Fuc1NeuAc1 | 3964.0                | 3963.3             | Hex6HexNAc5NeuAc4     |
| 2635.3                | 2635.2             | Hex5HexNAc4Fuc1NeuGc1 | 4022.0                | 4021.4             | Hex6HexNAc6Fuc1NeuAc3 |
| 2663.3                | 2663.2             | Hex5HexNAc5Fuc2       | 4226.1                | 4225.3             | Hex7HexNAc6Fuc1NeuAc3 |
| 2676.3                | 2676.2             | Hex5HexNAc5NeuAc1     | 4587.3                | 4586.4             | Hex7HexNAc6Fuc1NeuAc4 |
| 2693.4                | 2693.2             | Hex6HexNAc5Fuc1       | 4675.3                | 4674.9             | Hex8HexNAc7Fuc1NeuAc3 |

|        |        |                       |  |  |  |
|--------|--------|-----------------------|--|--|--|
| 2779.4 | 2779.2 | Hex5HexNAc4Fuc2NeuGc1 |  |  |  |
|--------|--------|-----------------------|--|--|--|
