# Supplementary material
Source: PubMed Central journal article supplement (PMC5083094)
Supplement: supp_M115.055798_Supplemental_Table_5.pdf [file supp_M115.055798_Supplemental_Table_5.pdf]

**Supplementary Table 5****Permethylated N-glycans observed in the MALDI-TOF MS spectrum of EVT**

The theoretical and observed m/z values of the glycans and the manual interpretations of the composition of these glycans are shown in the table. m/z is mass to charge ratio. Hex, hexose; HexNAc, N-acetylhexosamine; Fuc, Fucose; NeuAc, N-acetylneuraminic acid; NeuGc, N-glycolylneuraminic acid. The number behind the monosaccharide is its number in the corresponding glycan.

| Theoretical m/z value | Observed m/z value | Glycan composition    | Theoretical m/z value | Observed m/z value | Glycan composition    |
|-----------------------|--------------------|-----------------------|-----------------------|--------------------|-----------------------|
| 1579.8                | 1579.9             | Hex5HexNAc2           | 2850.4                | 2850.3             | Hex5HexNAc5Fuc1NeuAc1 |
| 1783.9                | 1784.0             | Hex6HexNAc2           | 2880.4                | 2880.3             | Hex6HexNAc5NeuAc1     |
| 1835.9                | 1836.0             | Hex3HexNAc4Fuc1       | 2966.5                | 2966.3             | Hex5HexNAc4Fuc1NeuAc2 |
| 1988.0                | 1988.1             | Hex7HexNAc2           | 3024.5                | 3024.3             | Hex5HexNAc5Fuc2NeuAc1 |
| 2029.0                | 2029.1             | Hex6HexNAc3           | 3054.5                | 3054.3             | Hex6HexNAc5Fuc1NeuAc1 |
| 2040.0                | 2040.1             | Hex4HexNAc4Fuc1       | 3140.6                | 3140.2             | Hex5HexNAc4Fuc2NeuAc2 |
| 2070.0                | 2070.1             | Hex5HexNAc4           | 3142.6                | 3142.3             | Hex7HexNAc6Fuc1       |
| 2081.1                | 2081.2             | Hex3HexNAc5Fuc1       | 3211.6                | 3211.3             | Hex5HexNAc5Fuc1NeuAc2 |
| 2156.1                | 2156.1             | Hex4HexNAc3Fuc1NeuAc1 | 3241.6                | 3241.3             | Hex6HexNAc5NeuAc2     |
| 2192.1                | 2192.1             | Hex8HexNAc2           | 3299.7                | 3299.4             | Hex6HexNAc6Fuc1NeuAc1 |
| 2244.1                | 2244.1             | Hex5HexNAc4Fuc1       | 3329.7                | 3329.3             | Hex7HexNAc6NeuAc1     |
| 2285.2                | 2285.1             | Hex4HexNAc5Fuc1       | 3415.7                | 3415.3             | Hex6HexNAc5Fuc1NeuAc2 |
| 2315.2                | 2315.2             | Hex5HexNAc5           | 3503.8                | 3503.3             | Hex7HexNAc6Fuc1NeuAc1 |
| 2396.2                | 2396.2             | Hex9HexNAc2           | 3589.8                | 3589.3             | Hex6HexNAc5Fuc2NeuAc2 |
| 2431.2                | 2431.2             | Hex5HexNAc4NeuAc1     | 3602.8                | 3602.3             | Hex6HexNAc5NeuAc3     |
| 2489.3                | 2489.2             | Hex5HexNAc5Fuc1       | 3776.9                | 3776.3             | Hex6HexNAc5Fuc1NeuAc3 |
| 2519.3                | 2519.2             | Hex6HexNAc5           | 3864.9                | 3864.3             | Hex7HexNAc6Fuc1NeuAc2 |
| 2592.3                | 2592.2             | Hex5HexNAc4Fuc3       | 3953.0                | 3952.3             | Hex8HexNAc7Fuc1NeuAc1 |
| 2600.3                | 2600.2             | Hex10HexNAc2          | 3964.0                | 3963.3             | Hex6HexNAc5NeuAc4     |
| 2605.3                | 2605.2             | Hex5HexNAc4Fuc1NeuAc1 | 4041.0                | 4040.4             | Hex9HexNAc8Fuc1       |
| 2663.3                | 2663.2             | Hex5HexNAc5Fuc2       | 4226.1                | 4225.4             | Hex7HexNAc6Fuc1NeuAc3 |

|        |        |                       |        |        |                       |
|--------|--------|-----------------------|--------|--------|-----------------------|
| 2676.3 | 2676.2 | Hex5HexNAc5NeuAc1     | 4314.2 | 4313.3 | Hex8HexNAc7Fuc1NeuAc2 |
| 2693.4 | 2693.3 | Hex6HexNAc5Fuc1       | 4402.2 | 4401.2 | Hex9HexNAc8Fuc1NeuAc1 |
| 2779.4 | 2779.3 | Hex5HexNAc4Fuc2NeuGc1 | 4587.3 | 4586.2 | Hex7HexNAc6Fuc1NeuAc4 |
| 2792.4 | 2792.2 | Hex5HexNAc4NeuAc2     | 4675.3 | 4674.2 | Hex8HexNAc7Fuc1NeuAc3 |
